# Supplementary material for: Genetic substructure in cynomolgus macaques (Macaca fascicularis) on the island of Mauritius
Source: PubMed Central journal article supplement (PMC4167525; doi:10.1186/1471-2164-15-748), 2014-08-31

A.  $\ln \Pr(X|K)$

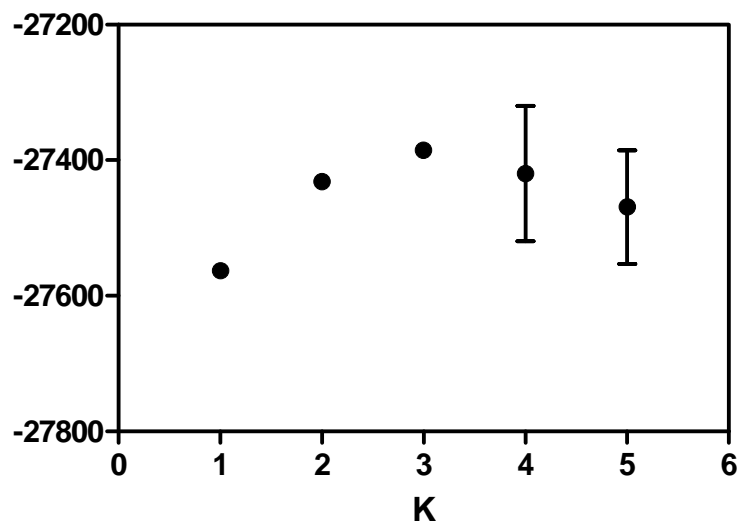

B.  $\ln' \Pr(X|K)$

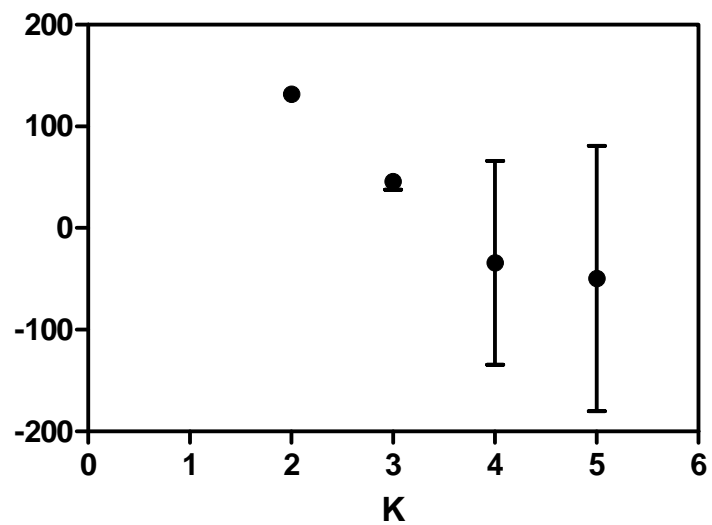

C.  $|\ln'' \Pr(X|K)|$

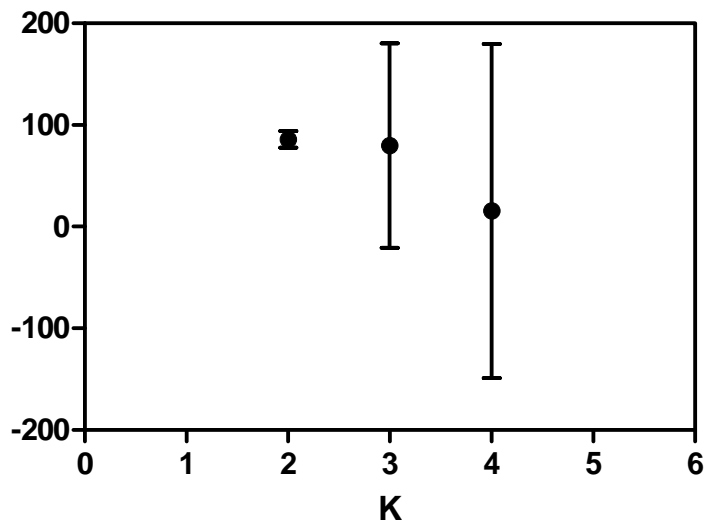

D.  $\Delta K$

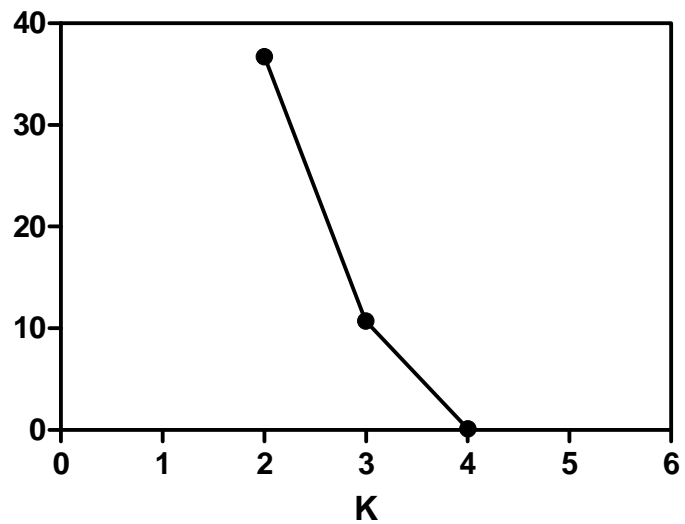

Supplement: 12864_2014_6440_MOESM4_ESM.pdf [file 12864_2014_6440_MOESM4_ESM.pdf]
